# Supplementary material for: In situ fabrication of Z-scheme C3N4/Ti3C2/CdS for efficient photocatalytic hydrogen peroxide production
Source: Royal Society of Chemistry journal article supplement (doi:10.1039/d3cp01758c), 2023-01-01
Supplement: d3cp01758c1.pdf [file d3cp01758c1.pdf]

**In-situ fabrication Z-Scheme  $C_3N_4/Ti_3C_2/CdS$  for enhanced photocatalytic  
hydrogen peroxide production**

Jianrui Cao &, Suyu Zhou &, Junhao Cai, Ruoping Li\* and  
Mingju Huang\*\*.

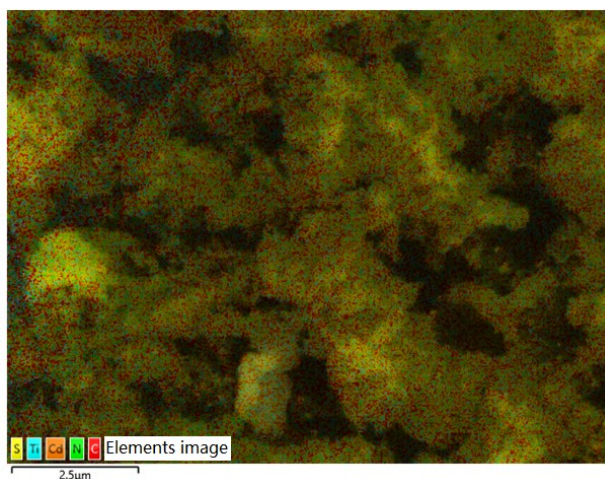

$C_3N_4/Ti_3C_2/CdS-1$

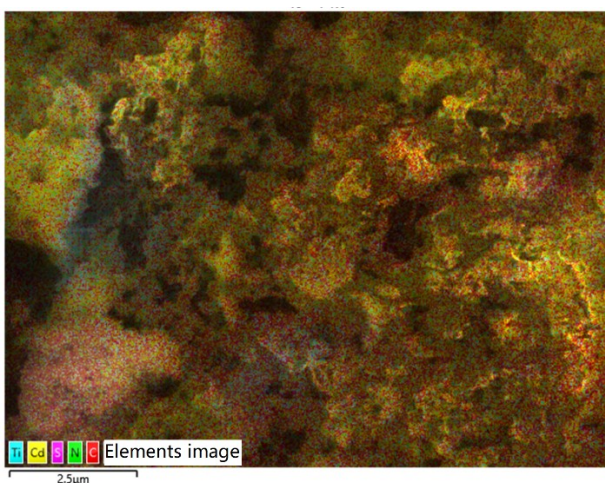

$C_3N_4/Ti_3C_2/CdS-2$

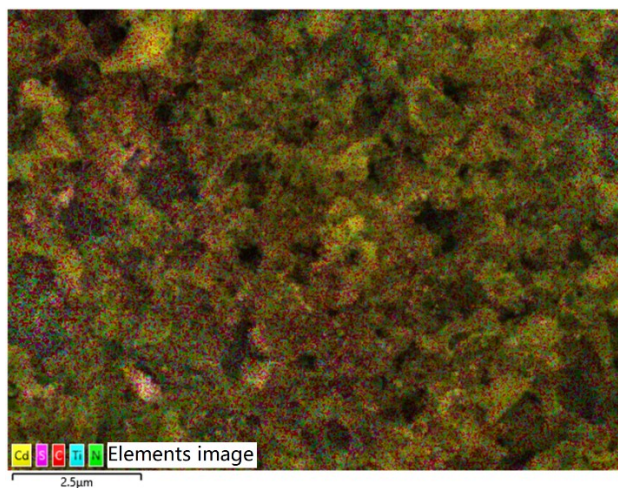

$C_3N_4/Ti_3C_2/CdS-3$

Figure S1. EDS elements images

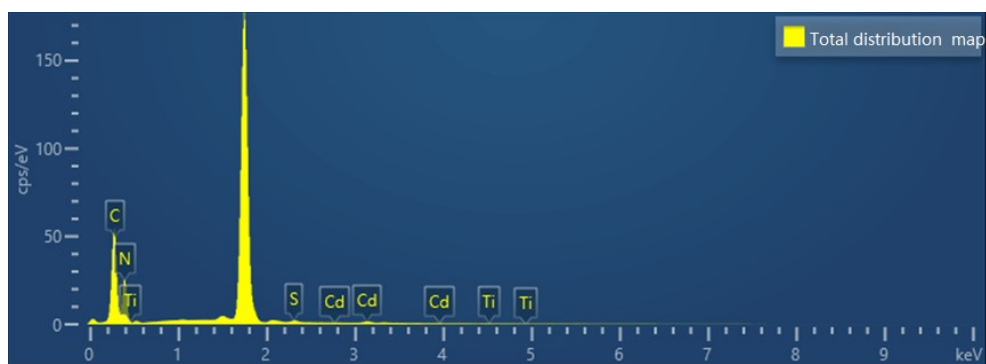

$C_3N_4/Ti_3C_2/CdS-1$

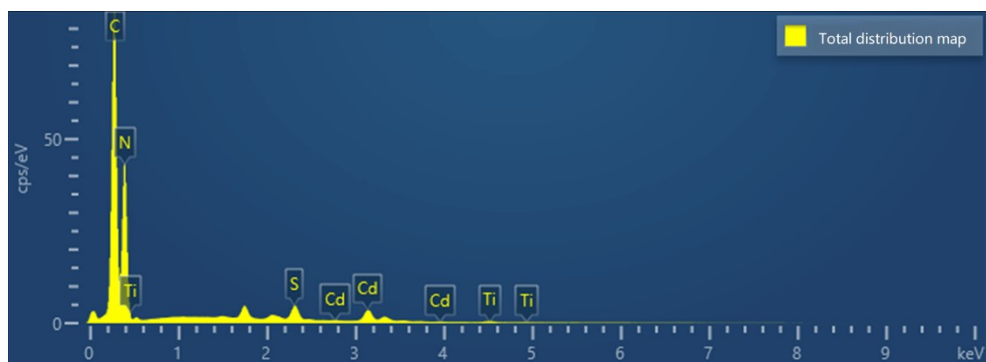

$C_3N_4/Ti_3C_2/CdS-2$

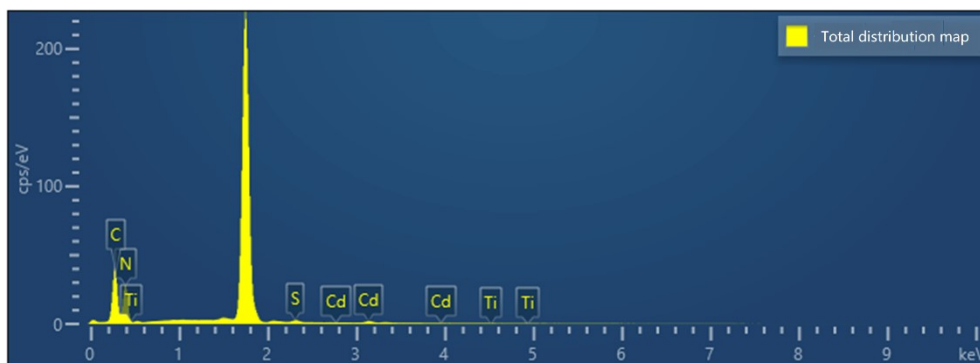

C<sub>3</sub>N<sub>4</sub>/Ti<sub>3</sub>C<sub>2</sub>/CdS-3

Figure S2 Total distribution map

Table S1. EDS analysis C<sub>3</sub>N<sub>4</sub>/Ti<sub>3</sub>C<sub>2</sub>/CdS-1

| Elements | Line type | Weight percentage | Atomic percentage |
|----------|-----------|-------------------|-------------------|
| C        | K lines   | 36.95             | 42.26             |
| N        | K lines   | 57.82             | 56.70             |
| Ti       | K lines   | 0.28              | 0.08              |
| S        | K lines   | 1.15              | 0.49              |
| Cd       | L lines   | 3.80              | 0.46              |
| Total    |           | 100.00            | 100.00            |

Table S2. EDS analysis C<sub>3</sub>N<sub>4</sub>/Ti<sub>3</sub>C<sub>2</sub>/CdS-2

| Elements | Line type | Weight percentage | Atomic percentage |
|----------|-----------|-------------------|-------------------|
| C        | K lines   | 35.35             | 42.37             |
| N        | K lines   | 53.94             | 55.44             |
| Ti       | K lines   | 0.71              | 0.21              |
| S        | K lines   | 2.17              | 0.97              |
| Cd       | L lines   | 7.84              | 1.00              |
| Total    |           | 100.00            | 100.00            |

Table S3. EDS analysis C<sub>3</sub>N<sub>4</sub>/Ti<sub>3</sub>C<sub>2</sub>/CdS-3

| lements | Line type | Weight percentage | Atomic percentage |
|---------|-----------|-------------------|-------------------|
| C       | K lines   | 31.21             | 36.78             |
| N       | K lines   | 61.09             | 61.72             |
| Ti      | K lines   | 0.09              | 0.03              |
| S       | K lines   | 1.64              | 0.73              |
| Cd      | L lines   | 5.96              | 0.75              |
| Total   |           | 100.00            | 100.00            |

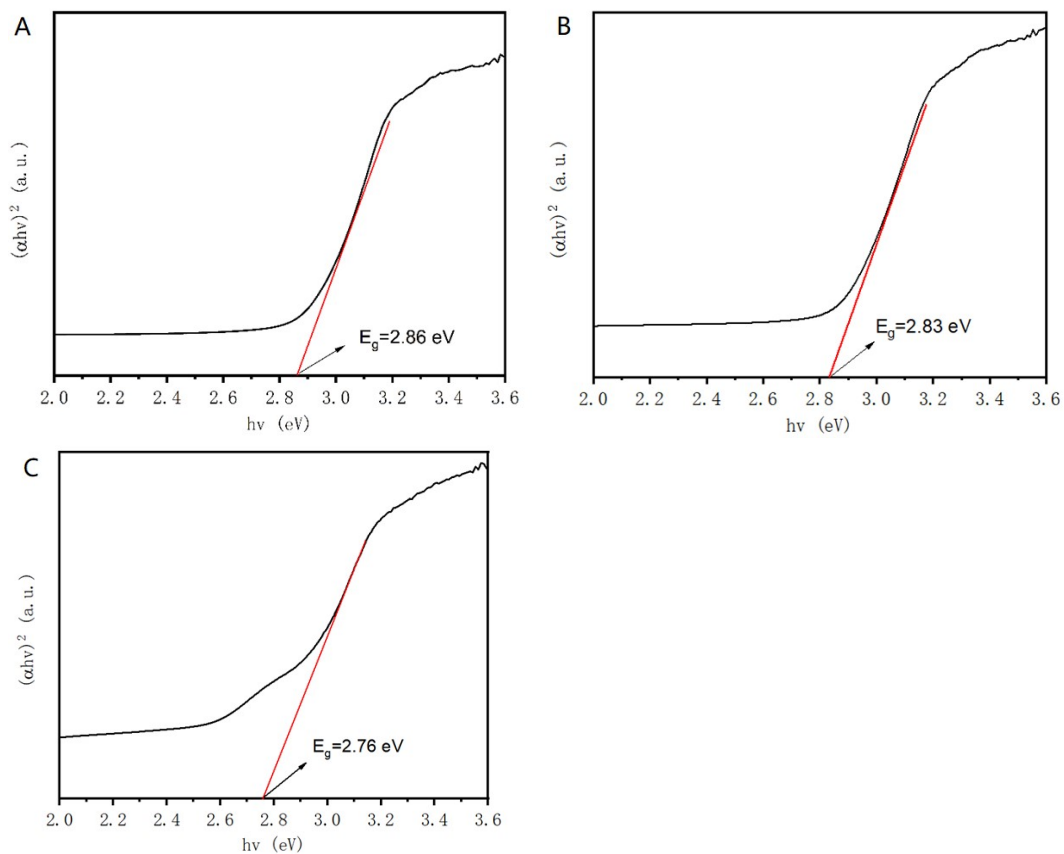

Figure S3. Band gap energies of  $C_3N_4$  (A),  $C_3N_4/Ti_3C_2$  (B) and  $C_3N_4/Ti_3C_2/CdS-2$  (C)

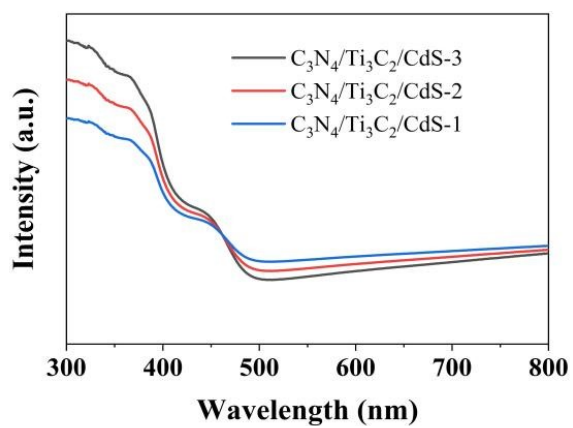

Figure S4. UV-vis DRS of ternary composite at different ratios of CdS

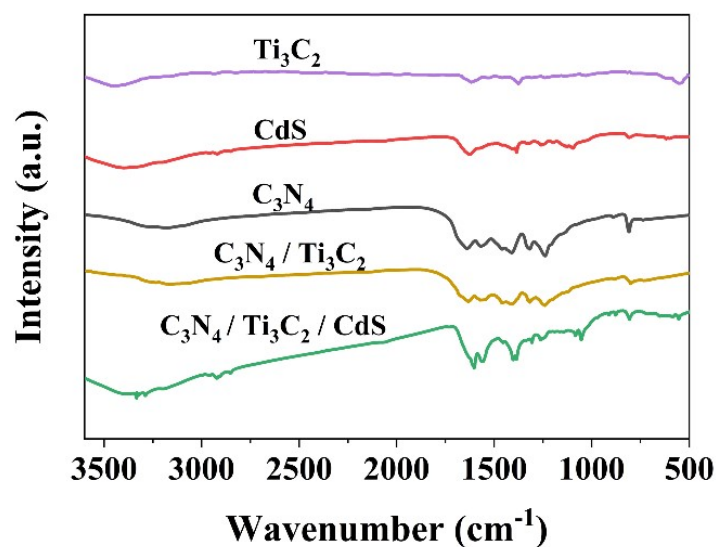

Figure S5. FT-IR spectra of  $\text{Ti}_3\text{C}_2$ , CdS,  $\text{C}_3\text{N}_4$ ,  $\text{C}_3\text{N}_4/\text{Ti}_3\text{C}_2$  and  $\text{C}_3\text{N}_4/\text{Ti}_3\text{C}_2/\text{CdS}$ .

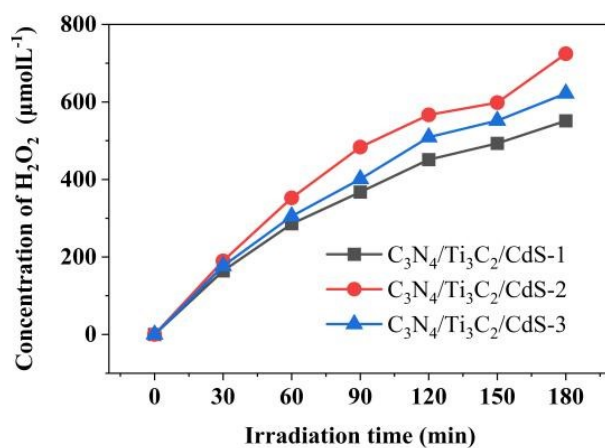

Figure S6. The photocatalytic production of hydrogen peroxide of ternary composite with different ratio of CdS.

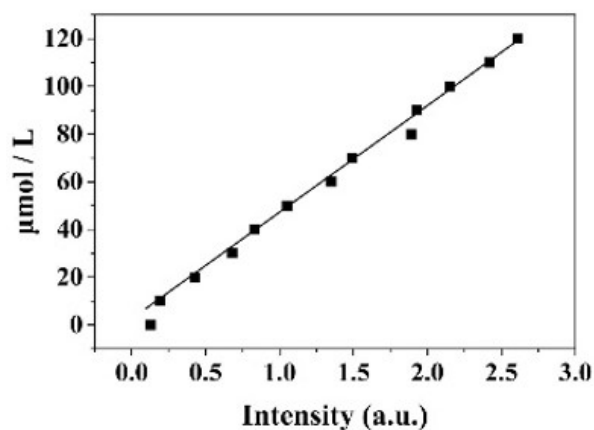

Figure S7. The calibration fitting curve of hydrogen peroxide content by iodometry.
